# Supplementary material for: Influences of Crystallinity and Crosslinking Density on the Shape Recovery Force in Poly(ε-Caprolactone)-Based Shape-Memory Polymer Blends
Source: MDPI journal article supplement (doi:10.3390/polym14214740), 2022-11-04
Supplement: s1 [file s1]

# Supplementary Information: Influences of Crystallinity and Crosslinking Density on the Shape Recovery Force in Poly( $\epsilon$ -Caprolactone)-Based Shape-Memory Polymer Blends

Ailifeire Fulati <sup>1,2</sup>, Koichiro Uto <sup>1</sup> and Mitsuhiro Ebara <sup>1,2,3,\*</sup>

<sup>1</sup> Research Center for Functional Materials, National Institute for Materials Science, Tsukuba 3050044, Japan

<sup>2</sup> Graduate School of Science and Technology, University of Tsukuba, Tsukuba 3058577, Japan

<sup>3</sup> Graduate School of Advanced Engineering, Tokyo University of Science, Tokyo 1258585, Japan

\* Correspondence: ebara.mitsuhiro@nims.go.jp

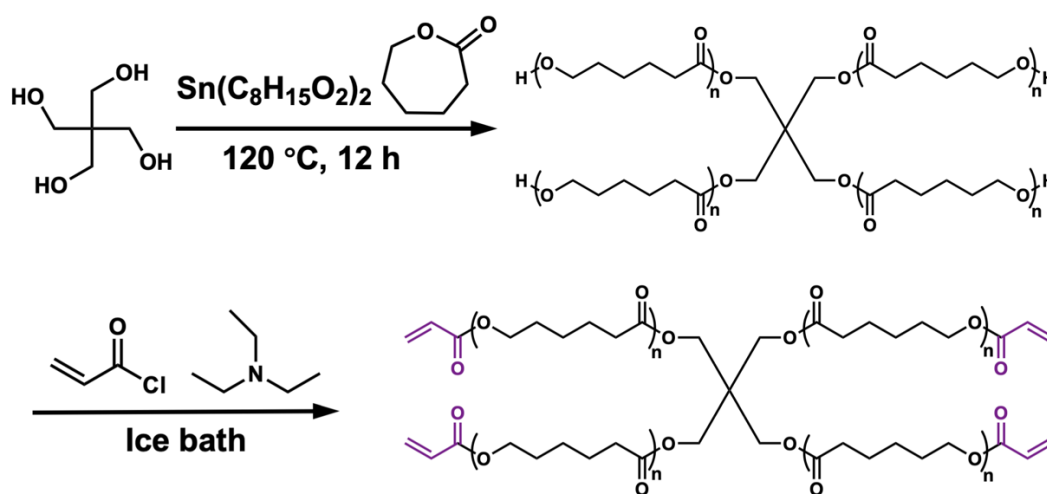

**Scheme 1.** Synthesis scheme of 4bPCL.

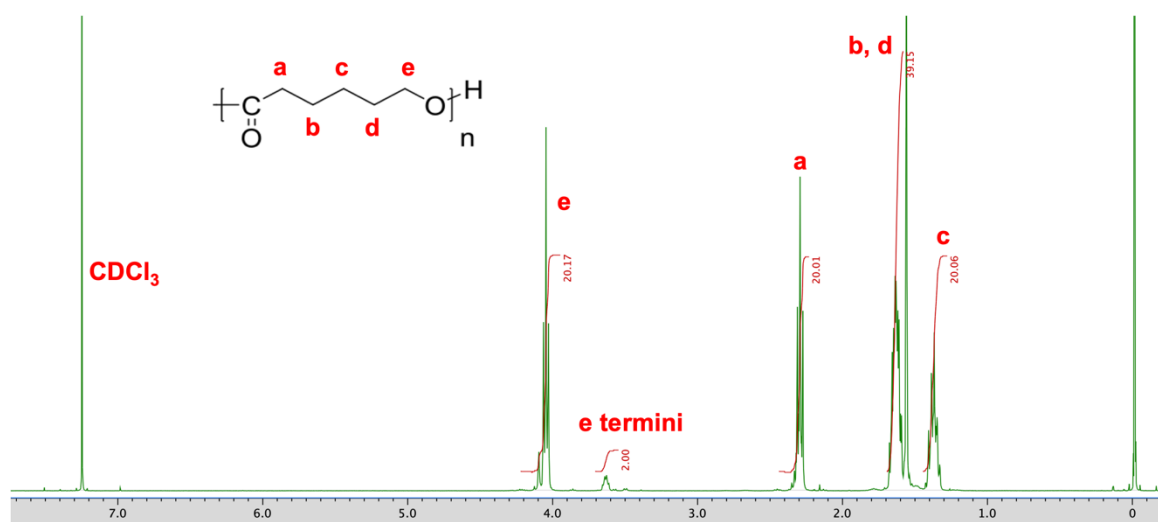

**Figure S1.** Representative  $^1\text{H}$ -NMR spectra of 4b10 PCL

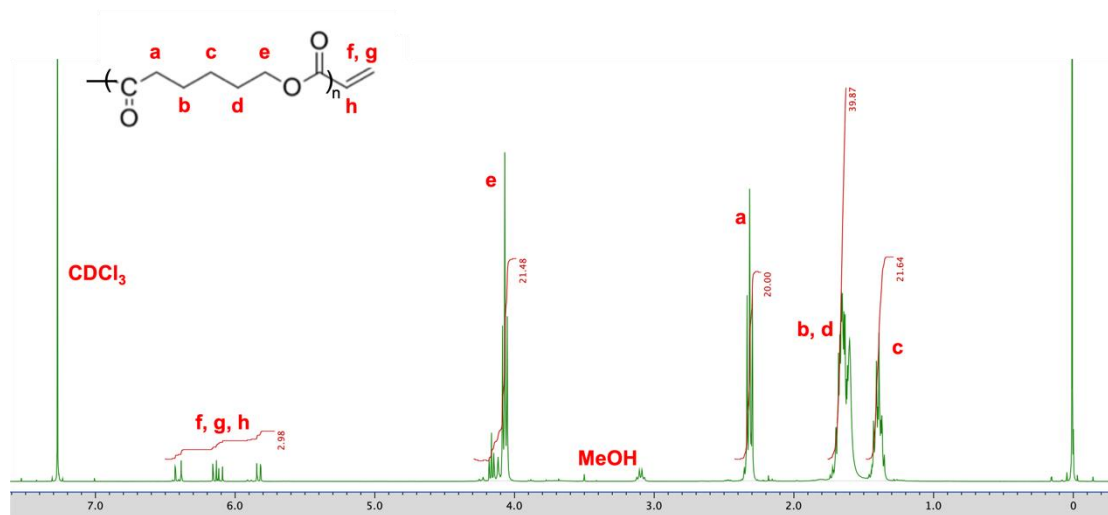

**Figure S2.** Representative <sup>1</sup>H-NMR spectra of 4b10 PCL macromonomer

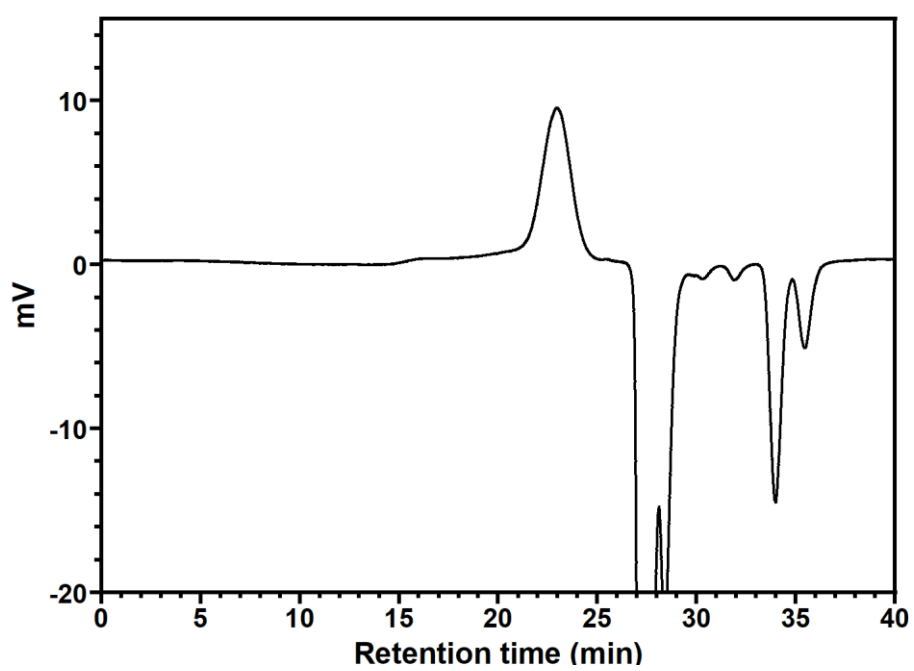

**Figure S3.** Representative GPC trace of 4b10PCL

**Table S1.** Molecular weights, polydispersity indexes and end group introduction rates of 4b10PCL and 4b100PCL macromonomers.

| Polymer type    | Mn (Da) <sup>1)</sup> | Mw (Da) <sup>1)</sup> | PDI <sup>1)</sup> | I.R. (%) <sup>2)</sup> |
|-----------------|-----------------------|-----------------------|-------------------|------------------------|
| 4b10 PCL-macro  | 6296                  | 7022                  | 1.115             | 99.3                   |
| 4b100 PCL-macro | 41126                 | 63661                 | 1.550             | 95.2                   |

I.R.: End group introduction rate

1) Measured by GPC. Solvent: DMF. Standard: PS.

2) Calculated by <sup>1</sup>H NMR; solvent: CDCl<sub>3</sub>

**Table S2.** Thermal properties of 4b100PCL/4b10PCL blend polymer systems.

| Sample                        | T <sub>m</sub> (°C) | T <sub>c</sub> (°C) | ΔH <sub>m</sub> (mJ/mg) | ΔH <sub>c</sub> | χ <sub>c</sub> (%) |
|-------------------------------|---------------------|---------------------|-------------------------|-----------------|--------------------|
| <b>4b100PCL/4b10PCL_100:0</b> | 57.3                | 27.7                | 53.6                    | -50.1           | 39.41              |
| <b>4b100PCL/4b10PCL_90:10</b> | 53.9                | 28.3                | 43.9                    | -51.1           | 32.28              |
| <b>4b100PCL/4b10PCL_80:20</b> | 53.2                | 28.5                | 43                      | -50.9           | 31.62              |
| <b>4b100PCL/4b10PCL_70:30</b> | 52.1                | 25.5                | 40.4                    | -50.4           | 29.71              |
| <b>4b100PCL/4b10PCL_60:40</b> | 51                  | 24.3                | 37.3                    | -46.4           | 27.43              |
| <b>4b100PCL/4b10PCL_50:50</b> | 49.5                | 22.8                | 34.7                    | -42.9           | 25.52              |
| <b>4b100PCL/4b10PCL_40:60</b> | 46.6                | 15.4                | 28.1                    | -35.9           | 20.66              |
| <b>4b100PCL/4b10PCL_30:70</b> | 42.2                | 2.4                 | 25                      | -28.6           | 18.38              |
| <b>4b100PCL/4b10PCL_20:80</b> | 38.1                | 1.8                 | 20.9                    | -27.9           | 15.37              |
| <b>4b100PCL/4b10PCL_10:90</b> | 26.3                | -10.9               | 18.4                    | -22             | 13.53              |
| <b>4b100PCL/4b10PCL_0:100</b> | 20.5                | -19.1               | 14.5                    | -11             | 10.66              |

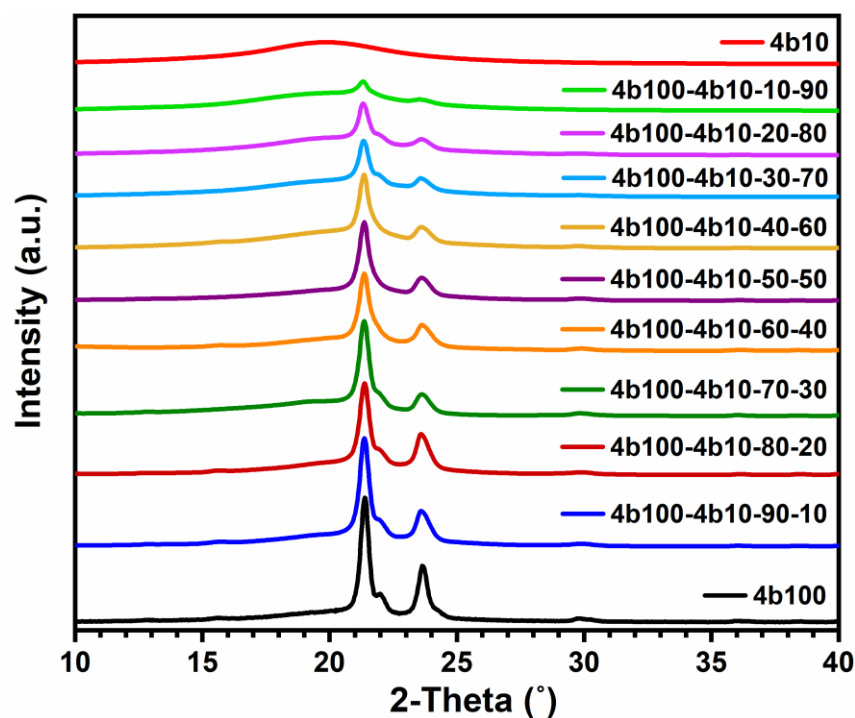

**Figure S4.** XRD patterns of 4b100PCL/4b10PCL blend polymer films.

**Table S3.** Mechanical properties of 4b100PCL/4b10PCL blend polymer systems in the uniaxial tensile test at room temperature.

| Sample                        | Elastic modulus (MPa) | Toughness (MJ/m <sup>3</sup> ) | Strain at break (%) |
|-------------------------------|-----------------------|--------------------------------|---------------------|
| <b>4b100PCL/4b10PCL_100:0</b> | 250.4                 | 130.4                          | 1003.6              |
| <b>4b100PCL/4b10PCL_90:10</b> | 185.1                 | 105.0                          | 952.6               |
| <b>4b100PCL/4b10PCL_80:20</b> | 183.0                 | 102.2                          | 872.0               |
| <b>4b100PCL/4b10PCL_70:30</b> | 159.5                 | 51.6                           | 549.2               |
| <b>4b100PCL/4b10PCL_60:40</b> | 144.9                 | 41.5                           | 359.5               |
| <b>4b100PCL/4b10PCL_50:50</b> | 90.2                  | 32.0                           | 315.3               |
| <b>4b100PCL/4b10PCL_40:60</b> | 69.6                  | 24.7                           | 283.9               |
| <b>4b100PCL/4b10PCL_30:70</b> | 27.3                  | 14.7                           | 245.5               |
| <b>4b100PCL/4b10PCL_20:80</b> | 16.6                  | 8.1                            | 197.9               |
| <b>4b100PCL/4b10PCL_10:90</b> | 9.9                   | 4.5                            | 151.6               |
| <b>4b100PCL/4b10PCL_0:100</b> | 2.6                   | 0.6                            | 86.5                |

**Table S4.** Mechanical properties of 4b100PCL/4b10PCL blend polymer systems in the uniaxial tensile test at 60°C.

| Sample                        | Elastic modulus (MPa) | Stretchability (%) |
|-------------------------------|-----------------------|--------------------|
| <b>4b100PCL/4b10PCL_100:0</b> | 0.5772                | 1419.5             |
| <b>4b100PCL/4b10PCL_90:10</b> | 0.6677                | 1049.0             |
| <b>4b100PCL/4b10PCL_80:20</b> | 0.7221                | 705.3              |
| <b>4b100PCL/4b10PCL_70:30</b> | 0.8579                | 576.1              |
| <b>4b100PCL/4b10PCL_60:40</b> | 0.8740                | 299.6              |
| <b>4b100PCL/4b10PCL_50:50</b> | 1.0302                | 156.3              |
| <b>4b100PCL/4b10PCL_40:60</b> | 1.2391                | 133.6              |
| <b>4b100PCL/4b10PCL_30:70</b> | 1.2766                | 110.0              |
| <b>4b100PCL/4b10PCL_20:80</b> | 1.6381                | 63.2               |
| <b>4b100PCL/4b10PCL_10:90</b> | 1.8530                | 57.5               |
| <b>4b100PCL/4b10PCL_0:100</b> | 2.0528                | 50.5               |
